# Supplementary material for: Context-dependent signaling of coincident auditory and visual events in primary visual cortex
Source: eLife journal article supplement (doi:10.7554/elife.44006), 2019-05-22

**A**

Raw neuronal signals

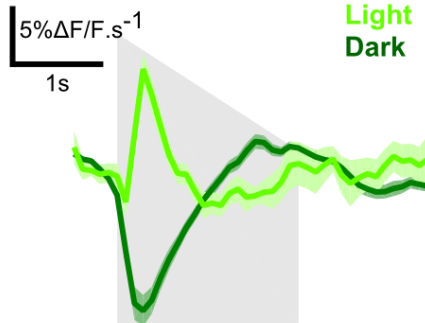

With subtraction of 0.7 \* local neuropil

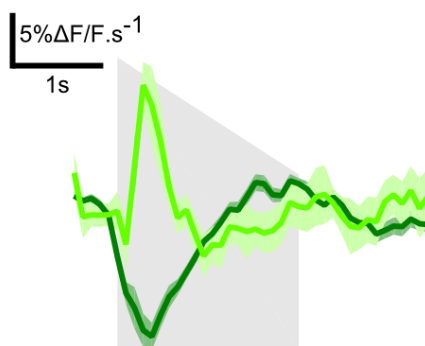

With subtraction of 1 \* local neuropil

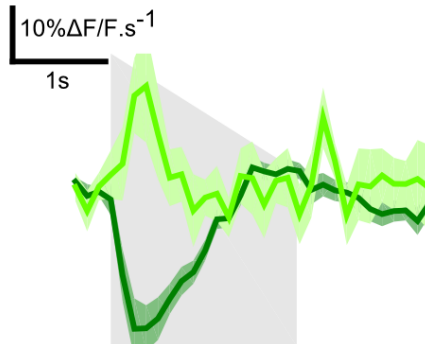**B**

Deconvolved signals

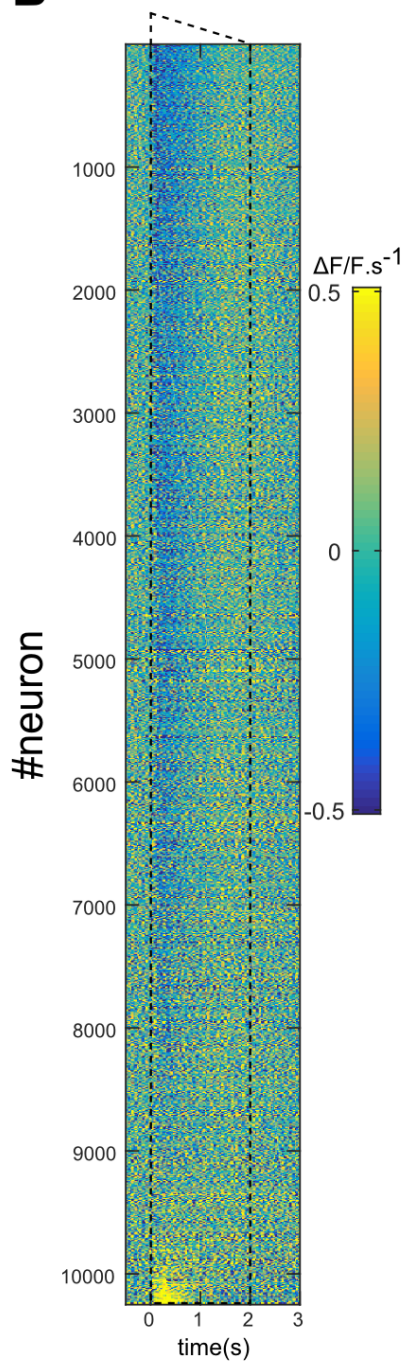

Raw signals

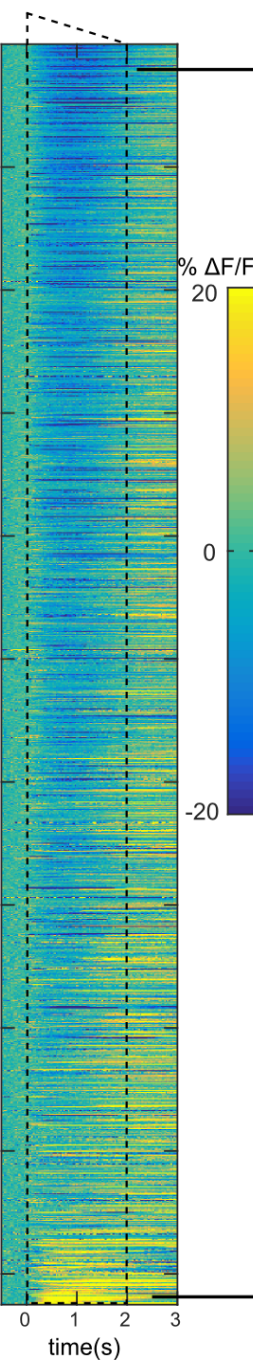**C**

Cell A: sound-triggered inhibition

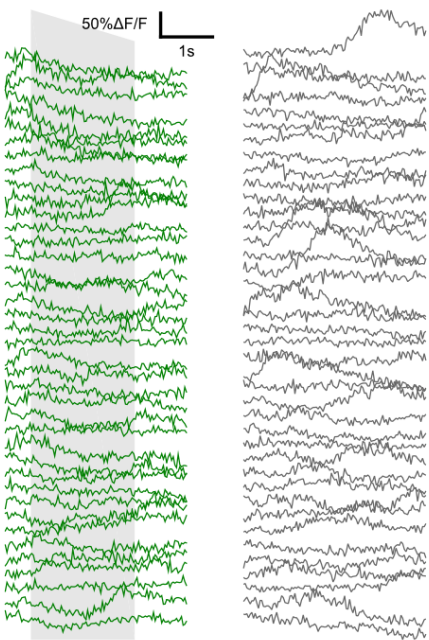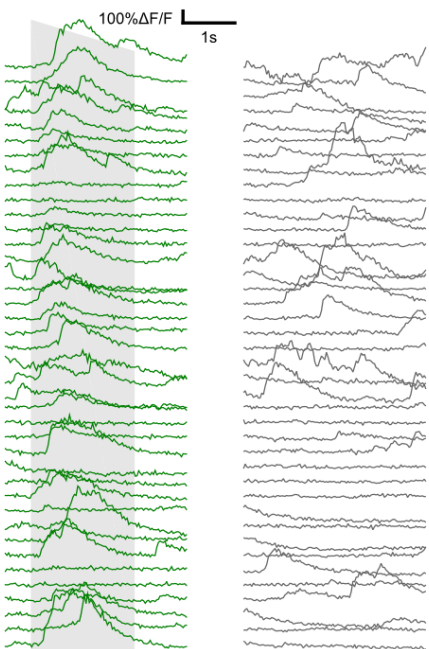

Cell B: Sound-triggered excitation

**D**

Simulated GCAMP6s signal

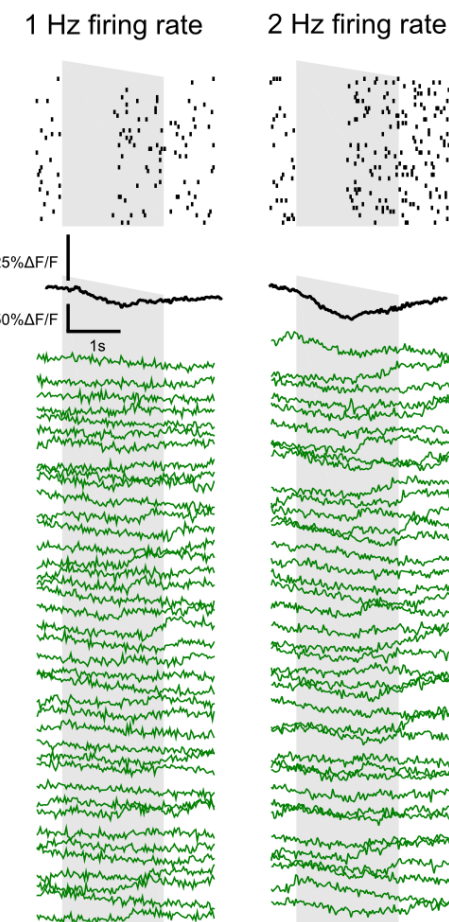

Supplement: supp [file elife-44006-supp-v1.zip]
