# Supplementary material for: Context-dependent signaling of coincident auditory and visual events in primary visual cortex
Source: eLife journal article supplement (doi:10.7554/elife.44006), 2019-05-22
Supplement: supp [file elife-44006-supp-v2.zip]

Archive with 9 entries (9 files):
- elife_poa_e44006_Figure_3_figure_supplement_1.pdf
- elife_poa_e44006_Figure_3_figure_supplement_2.pdf
- elife_poa_e44006_Transparent_Reporting_File.pdf
- elife_poa_e44006_Source_code_1.zip
- elife_poa_e44006_Figure_6_figure_supplement_1.pdf
- elife_poa_e44006_Figure_1_figure_supplement_2.pdf
- elife_poa_e44006_Figure_1_figure_supplement_3.pdf
- elife_poa_e44006_Figure_1_figure_supplement_1.pdf
- elife_poa_e44006_Figure_4_figure_supplement_1.pdf
