# Supplementary figures and images for: Context-dependent signaling of coincident auditory and visual events in primary visual cortex
Source: eLife journal article supplement (doi:10.7554/elife.44006), 2019-05-22

**A**

population average

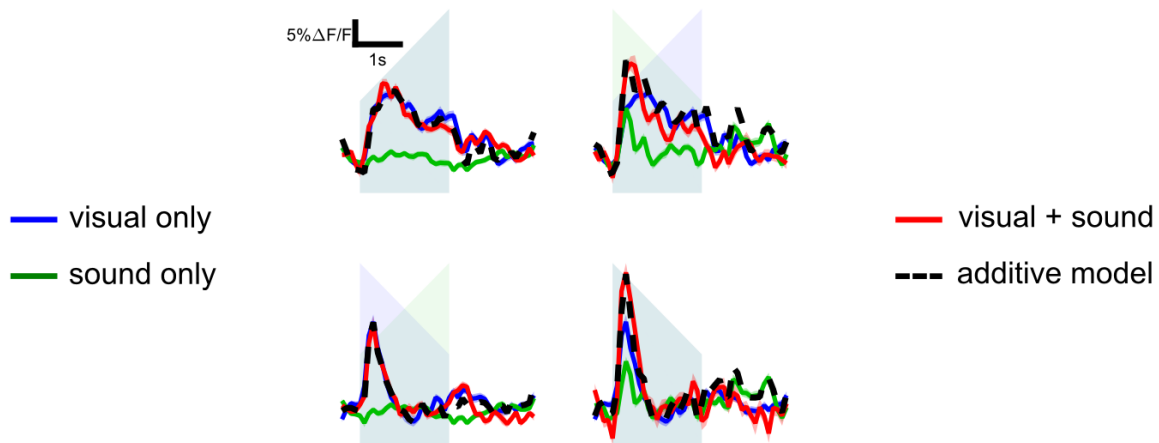**B**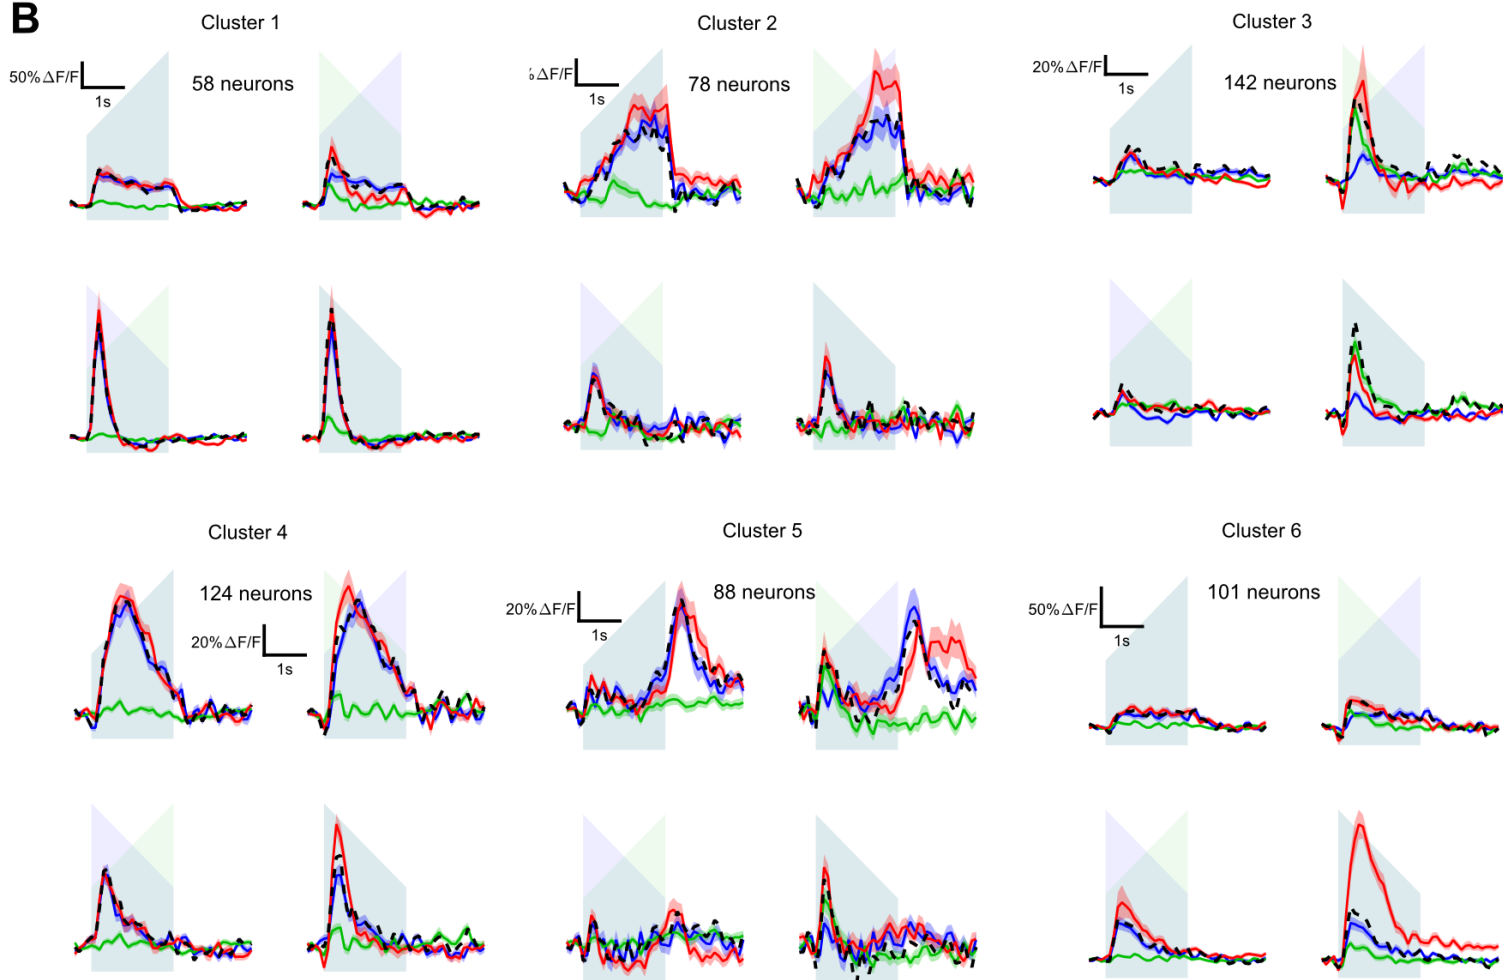

Supplement: supp [file elife-44006-supp-v1.zip]

**Dark**

$p = 0.62$

$p = 0.031$

**Musci.**  
**CNO**

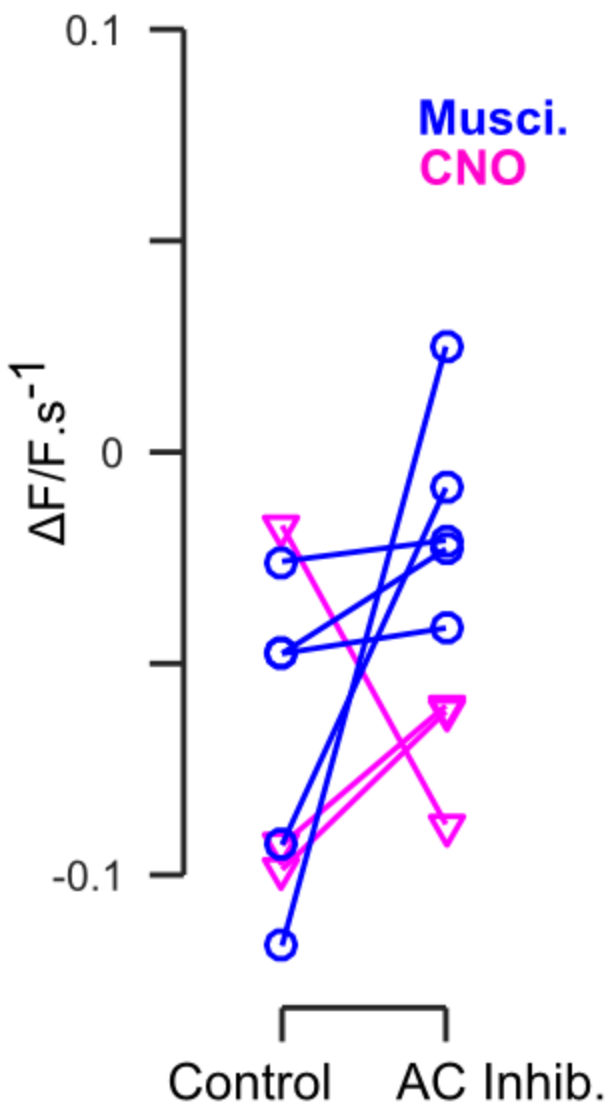

**Light**

$p = 0.12$

$p = 0.031$

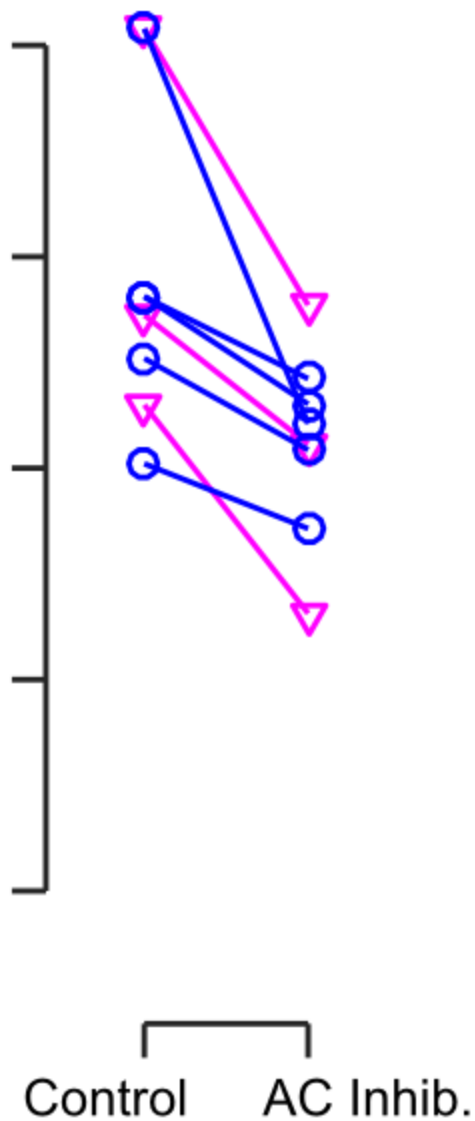

Supplement: supp [file elife-44006-supp-v1.zip]

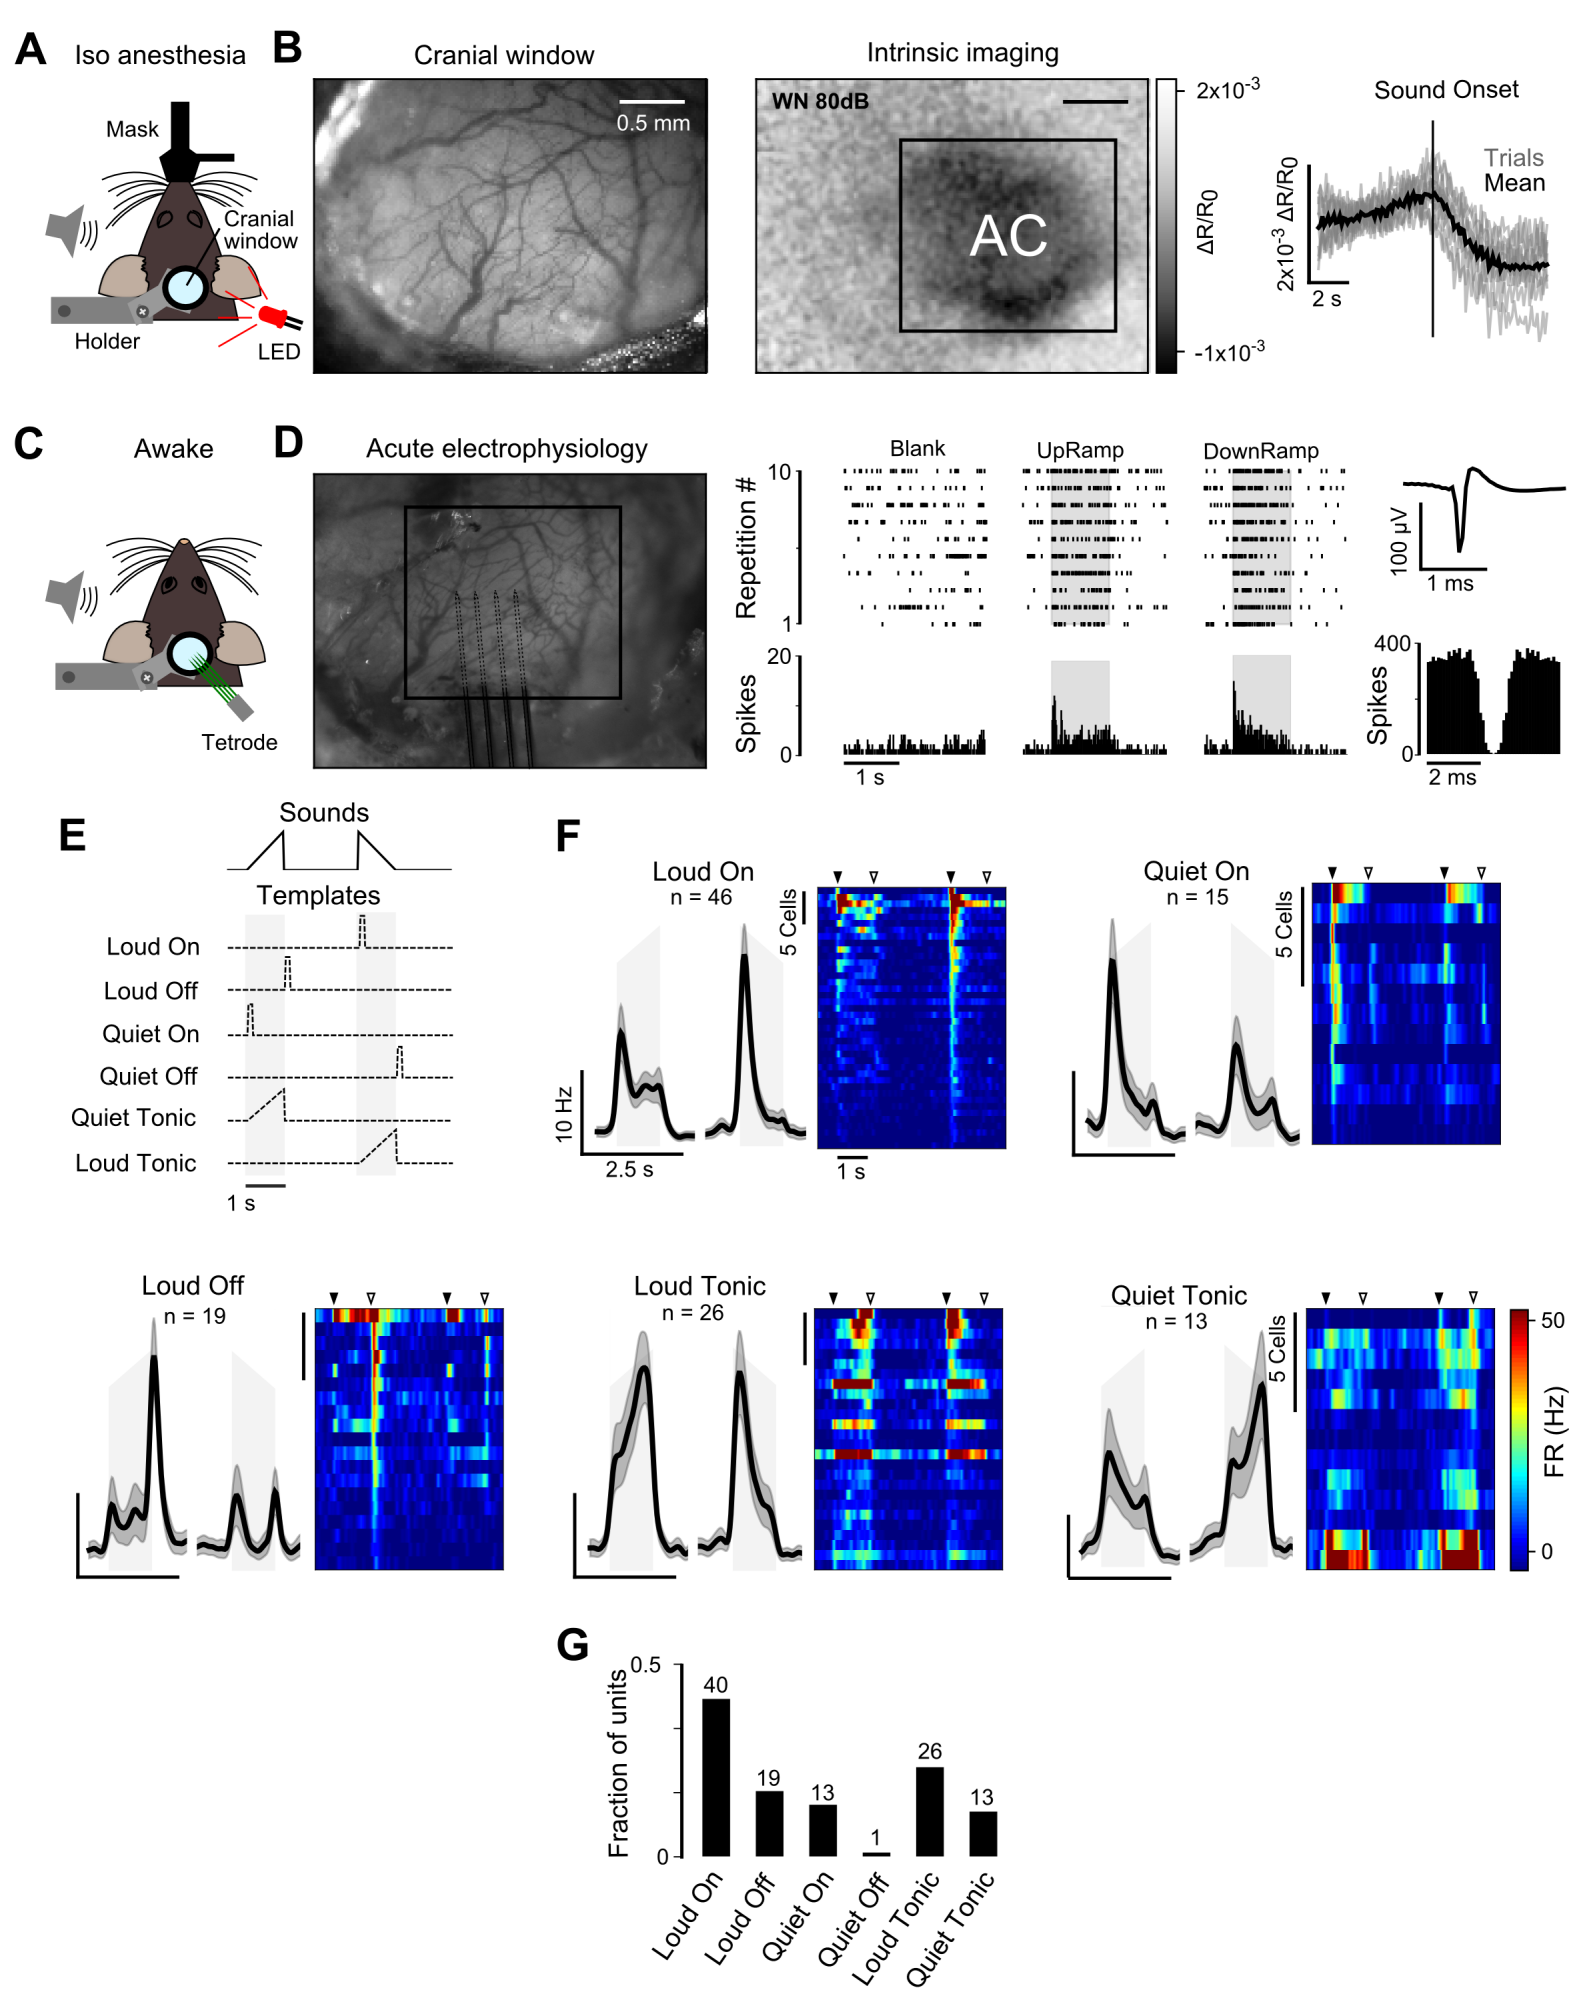

Supplement: supp [file elife-44006-supp-v1.zip]

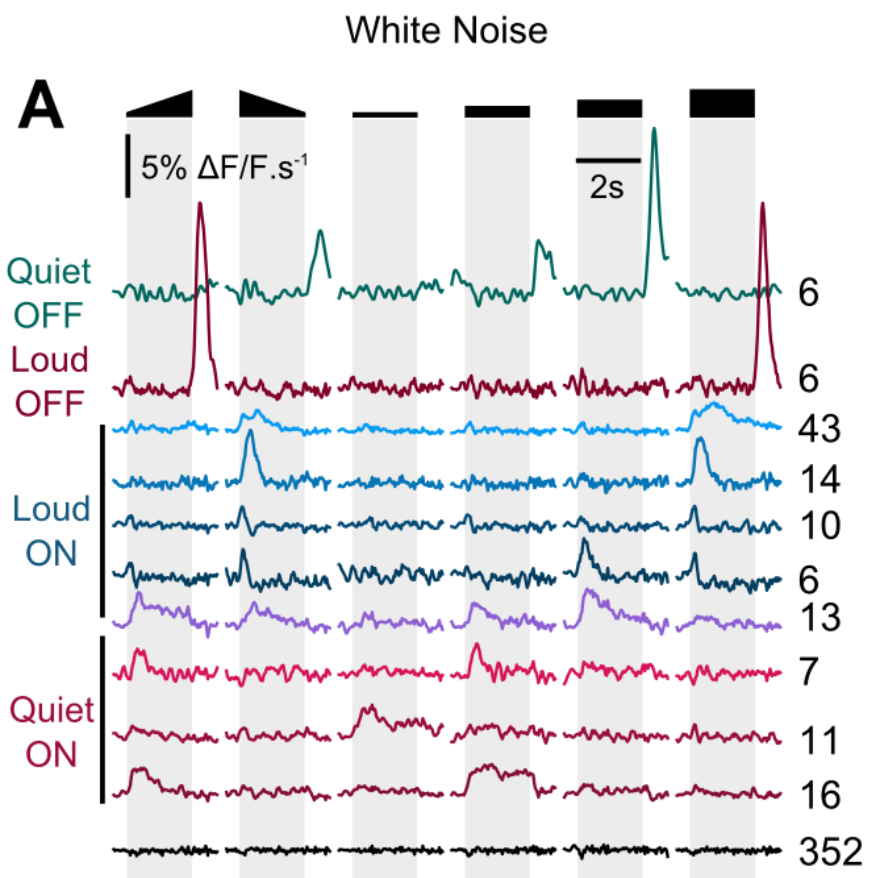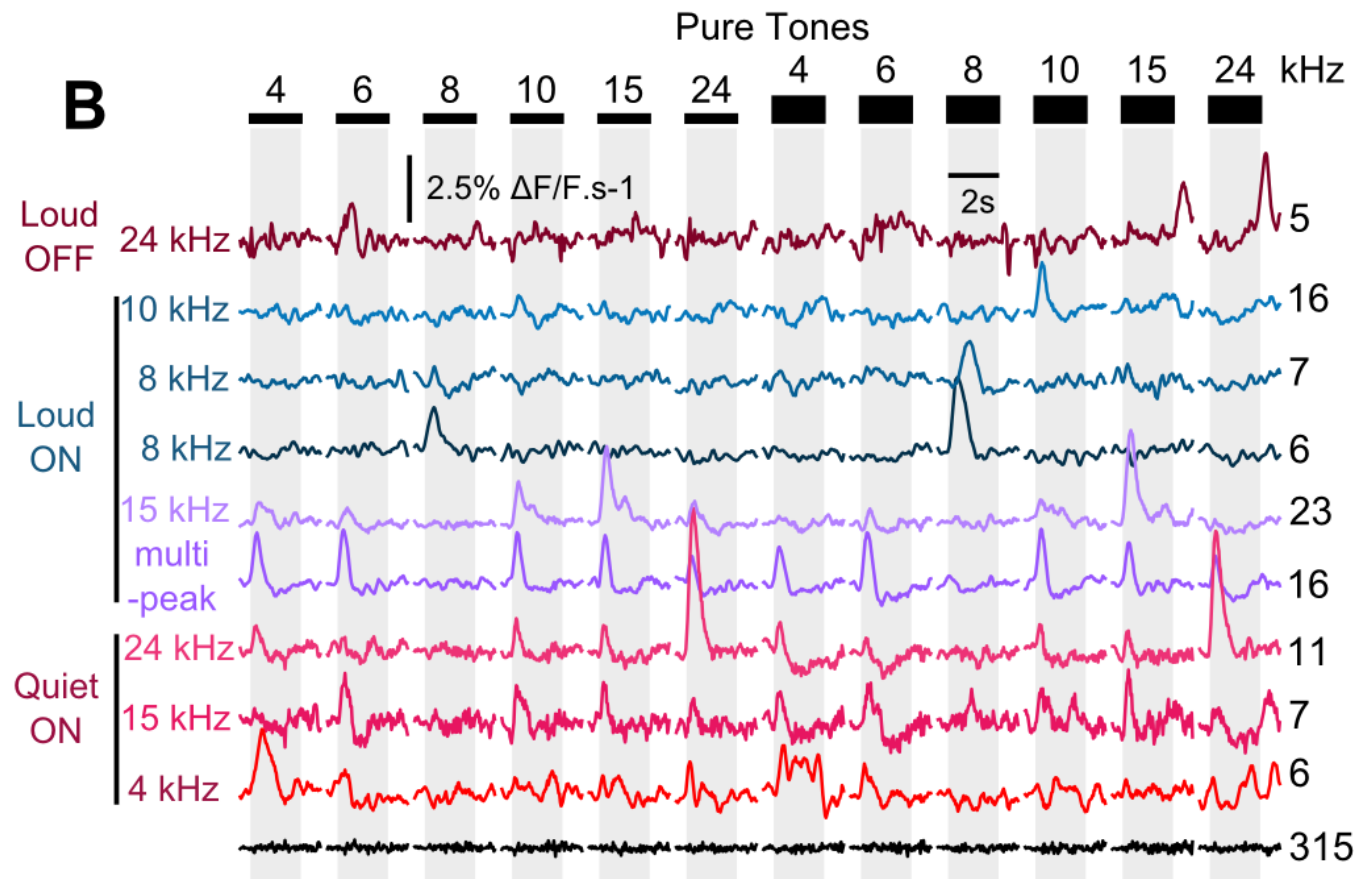

Supplement: supp [file elife-44006-supp-v1.zip]

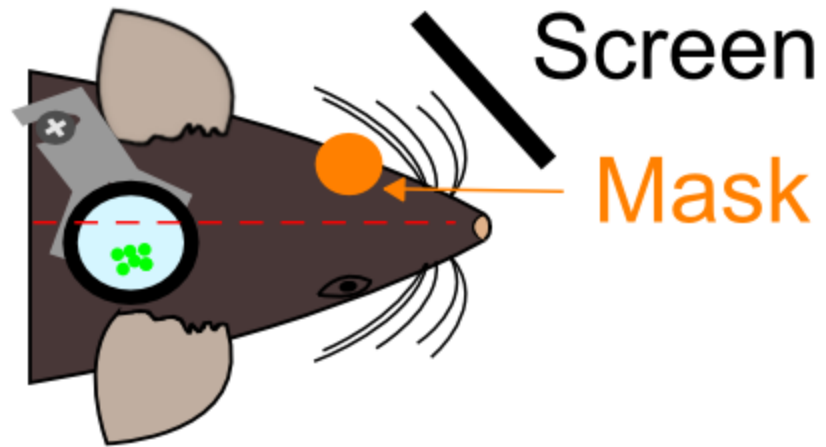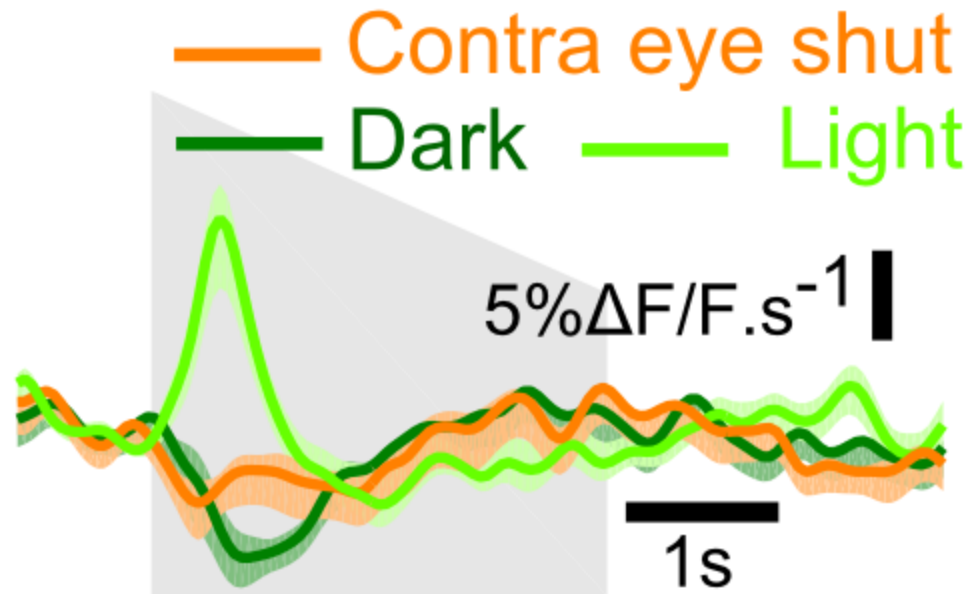

Supplement: supp [file elife-44006-supp-v1.zip]

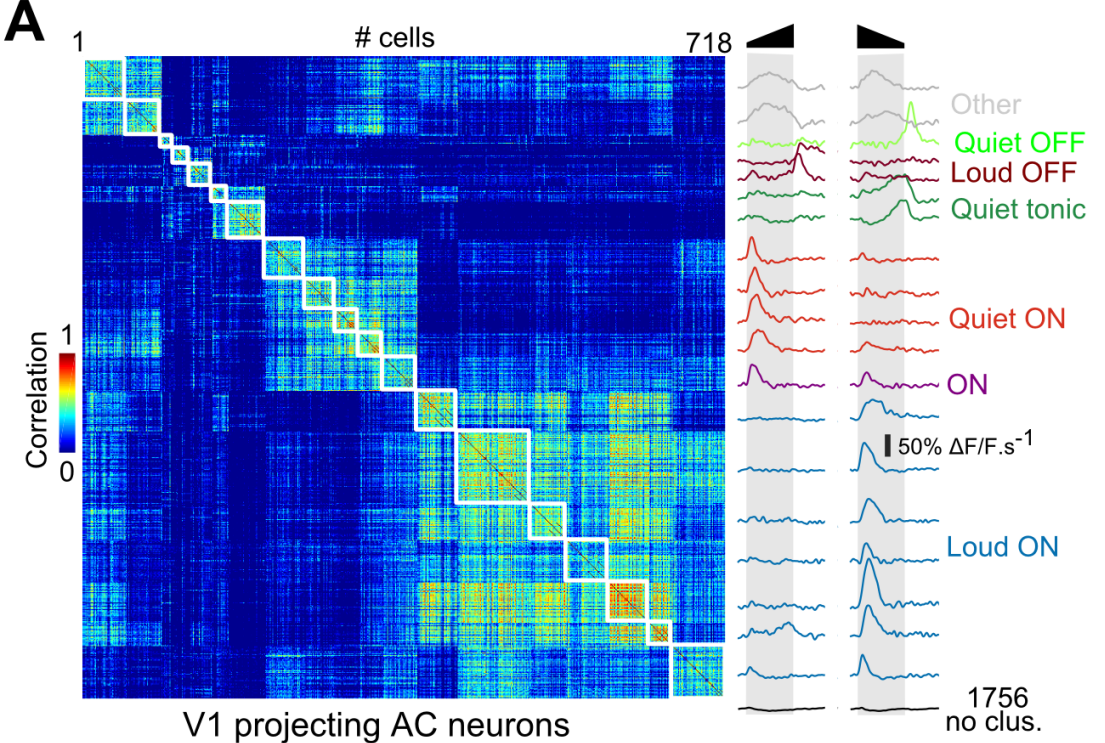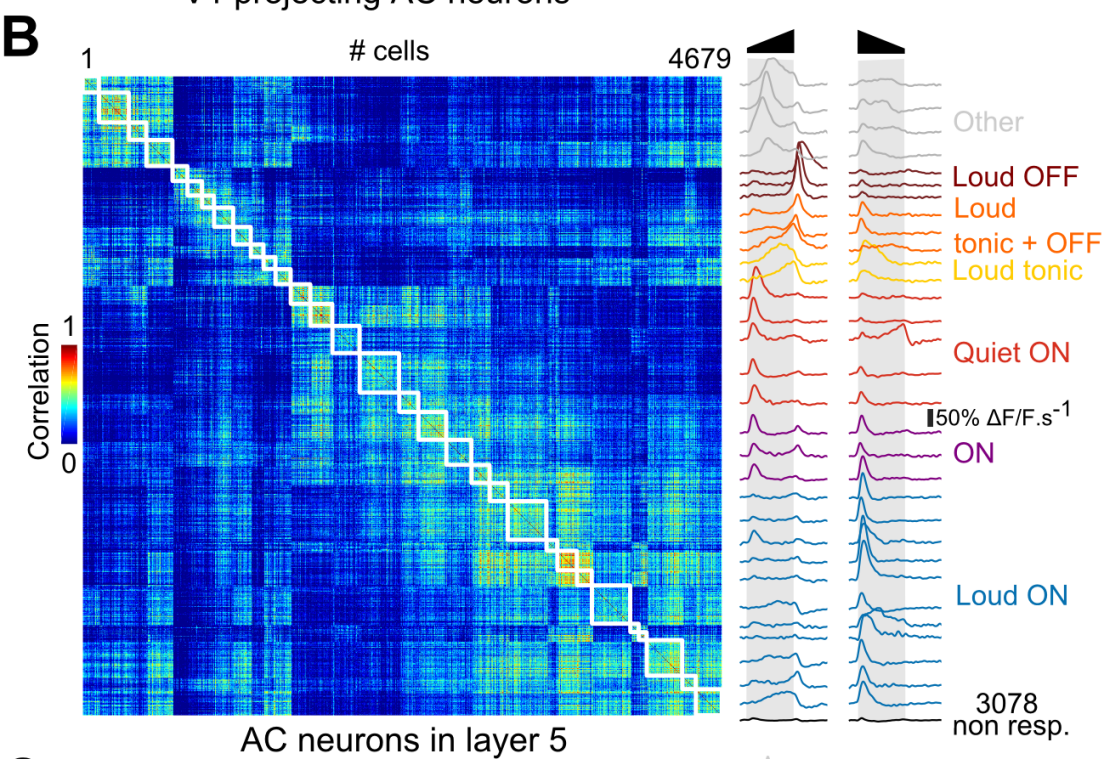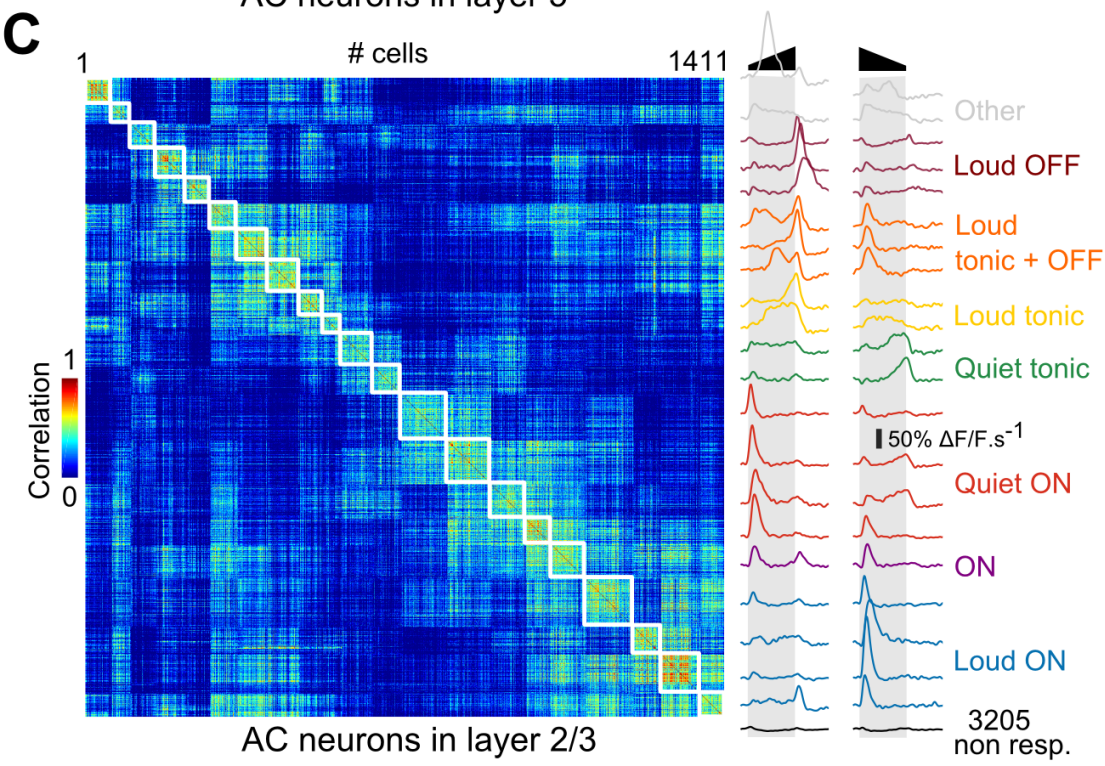

Supplement: supp [file elife-44006-supp-v1.zip]
